# Supplementary material for: Multidrug-Resistant Extended-Spectrum Beta-Lactamase (ESBL)-Producing Escherichia coli in a Dairy Herd: Distribution and Antimicrobial Resistance Profiles
Source: MDPI journal article supplement (doi:10.3390/antibiotics13030241), 2024-03-05
Supplement: s1 [file s1]

**Supplementary File S1.** MIC values expressed in µg/mL for the ESBL *E. coli* isolates assessed with the plate assay.

| Isolate | Aminosidine | Amoxicillin/Clavulanic Acid | Ampicillin | Cefazolin | Cefotaxime | Colistin | Enrofloxacin | Florfenicol | Flumequine | Gentamicin | Kanamycin | Sulfisoxazole | Tetracyclin | Trimethoprim/Sulfamethoxazole |
|---------|-------------|-----------------------------|------------|-----------|------------|----------|--------------|-------------|------------|------------|-----------|---------------|-------------|-------------------------------|
| M1      | >32         | =8                          | >32        | >8        | >4         | =0.25    | =0.5         | =8          | =16        | >32        | >32       | >512          | >16         | =0.125                        |
| M4      | >32         | =8                          | >32        | >8        | >4         | =0.25    | =0.031       | >64         | <=1        | =1         | >32       | >512          | >16         | >16                           |
| M5      | >32         | =8                          | >32        | >8        | >4         | =0.25    | <=0.016      | =8          | <=1        | =2         | >32       | >512          | >16         | =0.125                        |
| M8      | >32         | =8                          | >32        | >8        | >4         | =0.25    | =0.031       | =8          | <=1        | =1         | >32       | >512          | >16         | =0.125                        |
| M9      | >32         | =8                          | >32        | >8        | >4         | =0.25    | =0.063       | =8          | <=1        | =0.5       | >32       | >512          | >16         | =0.25                         |
| M12     | >32         | =8                          | >32        | >8        | >4         | =0.5     | =0.031       | >64         | <=1        | =1         | >32       | >512          | >16         | >16                           |
| M13     | >32         | =16                         | >32        | >8        | >4         | =0.5     | =0.031       | >64         | <=1        | =1         | >32       | >512          | >16         | >16                           |
| M14     | >32         | =8                          | >32        | >8        | >4         | =0.25    | =0.031       | =8          | <=1        | =2         | >32       | >512          | >16         | =0.25                         |
| M15     | >32         | =8                          | >32        | >8        | >4         | =0.25    | =32          | =4          | >16        | =0.5       | >32       | >512          | >16         | >16                           |
| M16     | >32         | =8                          | >32        | >8        | >4         | =0.25    | =0.25        | =4          | =8         | =1         | >32       | <=128         | >16         | <=0.063                       |
| M17     | >32         | =8                          | >32        | >8        | >4         | =0.25    | =0.063       | >64         | <=1        | >32        | >32       | >512          | >16         | =0.25                         |
| M18     | >32         | =32                         | >32        | >8        | >4         | =0.5     | =32          | >64         | >16        | >32        | >32       | >512          | >16         | >16                           |
| M19     | >32         | =8                          | >32        | >8        | >4         | =0.25    | =0.031       | =16         | <=1        | =1         | >32       | >512          | >16         | =0.25                         |
| F1      | >32         | =8                          | >32        | >8        | >4         | =0.5     | =0.063       | >64         | <=1        | =1         | >32       | >512          | >16         | >16                           |
| F2      | >32         | =8                          | >32        | >8        | >4         | =0.5     | =0.031       | >64         | <=1        | =1         | >32       | >512          | >16         | >16                           |
| F3      | >32         | =8                          | >32        | >8        | >4         | =0.5     | =0.031       | >64         | <=1        | =1         | >32       | >512          | >16         | >16                           |
| F6      | >32         | =8                          | >32        | >8        | >4         | =0.5     | =32          | =8          | >16        | =1         | >32       | >512          | =2          | >16                           |
| F8      | >32         | =8                          | >32        | >8        | >4         | =0.25    | =0.031       | >64         | <=1        | =1         | >32       | >512          | >16         | >16                           |
| F9      | >32         | =8                          | >32        | >8        | >4         | =0.25    | =0.031       | =8          | <=1        | =0.5       | >32       | >512          | >16         | =0.125                        |

| Isolate                     | Aminsidine | Amoxicillin/Clavulanic Acid | Ampicillin | Cefazolin | Cefotaxime | Colistin | Enrofloxacin | Florfenicol | Flumequine | Gentamicin | Kanamycin | Sulfisoxazole | Tetracyclin | Trimethoprim/Sulfametoxazole |
|-----------------------------|------------|-----------------------------|------------|-----------|------------|----------|--------------|-------------|------------|------------|-----------|---------------|-------------|------------------------------|
| F10                         | >32        | =8                          | >32        | >8        | >4         | =0.25    | <=0.016      | =8          | <=1        | =0.5       | >32       | >512          | >16         | =0.5                         |
| F11                         | >32        | =8                          | >32        | >8        | >4         | =0.5     | =0.031       | >64         | <=1        | =2         | >32       | >512          | >16         | >16                          |
| F12                         | >32        | =8                          | >32        | >8        | >4         | =0.5     | =0.031       | =16         | <=1        | =2         | >32       | >512          | >16         | =0.25                        |
| F13                         | >32        | =16                         | >32        | >8        | >4         | =0.25    | =0.031       | =16         | <=1        | =1         | >32       | >512          | >16         | =0.125                       |
| F14                         | >32        | =8                          | >32        | >8        | >4         | =0.5     | =32          | =8          | >16        | =0.5       | >32       | >512          | =2          | >16                          |
| F15                         | >32        | =8                          | >32        | >8        | >4         | =0.25    | =0.5         | =8          | =16        | =32        | >32       | >512          | =2          | >16                          |
| F16                         | >32        | =8                          | >32        | >8        | >4         | =0.25    | <=0.016      | =16         | <=1        | =1         | >32       | >512          | >16         | =0.5                         |
| F17                         | >32        | =8                          | >32        | >8        | >4         | =0.25    | <=0.016      | =8          | <=1        | =0.5       | >32       | >512          | >16         | =0.25                        |
| F18                         | >32        | =8                          | >32        | >8        | >4         | =0.5     | =0.125       | >64         | <=1        | =1         | >32       | >512          | >16         | > 16                         |
| Male pens                   | >32        | =8                          | >32        | >8        | >4         | =0.5     | =1           | >64         | =2         | >32        | >32       | >512          | >16         | >16                          |
| Female pens                 | >32        | =8                          | >32        | >8        | >4         | =0.5     | >32          | =8          | >16        | =1         | >32       | >512          | = 2         | >16                          |
| Treated cow 1               | >32        | =8                          | >32        | >8        | >4         | =0.5     | =0.5         | =8          | =8         | =1         | >32       | <=128         | >16         | <=0.063                      |
| Treated cow 2               | >32        | =8                          | >32        | >8        | >4         | =0.5     | =1           | =8          | =4         | =0.5       | >32       | <=128         | >16         | <=0.063                      |
| Waste milk                  | >32        | =16                         | >32        | >8        | >4         | =0.25    | =0.031       | =8          | <=1        | =0.5       | >32       | >512          | >16         | =0.125                       |
| Cow feeding rack            | >32        | =8                          | >32        | >8        | >4         | =0.25    | =0.5         | >64         | =2         | >32        | >32       | >512          | >16         | >16                          |
| Cow alley floor             | >32        | =8                          | >32        | >8        | >4         | =0.25    | =0.031       | =8          | <=1        | =0.5       | >32       | <=128         | >16         | <=0.063                      |
| Fresh cow alley floor       | >32        | =8                          | >32        | >8        | >4         | =0.25    | =1           | =8          | =4         | =1         | >32       | <=128         | >16         | =0.5                         |
| Primiparous cow alley floor | >32        | =8                          | >32        | >8        | >4         | =0.5     | =0.5         | =4          | =8         | =0.5       | >32       | <=128         | >16         | <=0.063                      |
| Calf feeding bucket         | >32        | =8                          | >32        | >8        | >4         | =0.5     | =0.5         | >64         | =4         | =2         | >32       | >512          | >16         | >16                          |
| Calf drinking water         | =4         | =16                         | >32        | >8        | >4         | =0.25    | =0.5         | =8          | =2         | =1         | =4        | >512          | >16         | >16                          |

Values are expressed in µg/mL.
