# Supplementary material for: Multidrug-Resistant Extended-Spectrum Beta-Lactamase (ESBL)-Producing Escherichia coli in a Dairy Herd: Distribution and Antimicrobial Resistance Profiles
Source: MDPI journal article supplement (doi:10.3390/antibiotics13030241), 2024-03-05
Supplement: s1 [file s1]

**Supplementary File S2.** Questionnaire of the study Multidrug-Resistant Extended-Spectrum Betalactamase (ESBL)-Producing *Escherichia Coli* in a Dairy Herd: Distribution and Antimicrobial Resistance Profiles.

Data of the participants

---



---

**I: General questions: breeding organization**

**Who takes care of the cattle?**

☒ The owner of the herd

☐ The family member(s)

☐ The employee(s)

☐ The contractor(s)

**How many... are present on the farm?**

| Breeding bulls | Dairy cows | Dry cows | Heifers | Weaned calves | Suckling calves |
|----------------|------------|----------|---------|---------------|-----------------|
| 0              | 457        | 86       | 254     | 153           | 50              |

**How many milking groups are there, and how are they divided (fresh/fresh/tight)?**

4 groups (primiparous - early - mid-late stage cows)

**Do you buy animals?** No

**Upon entering the farm, do you have to put...?**

|                     | Always                           | Sometimes             | Never                            |
|---------------------|----------------------------------|-----------------------|----------------------------------|
| Specific clothing   | <input type="radio"/>            | <input type="radio"/> | <input checked="" type="radio"/> |
| Single use clothing | <input checked="" type="radio"/> | <input type="radio"/> | <input type="radio"/>            |

## **II: Health management in the sick pen and management outbreaks**

**Are sick animals physically isolated from the rest of the herd?**

- ☒ Always
- ☐ Sometimes
- ☐ Never

**Are there specific equipment and materials (e.g., buckets, thermometers, cleaning and feeding utensils, gastric probes...) in the area used for sick animals?**

- ☒ Yes
- ☐ No

**Is this specific equipment cleaned and disinfected before a new animal enters the sick animal area?**

- ☐ It is cleaned and disinfected
- ☒ It is only cleaned
- ☐ No

**Are cattle in the area used for sick animals wholly separated from the rest of the herd?**

- ☐ Yes
- ☒ No

**I... before entering the area used for sick cattle**

|                        | Always                           | Sometimes                        | Never                            |
|------------------------|----------------------------------|----------------------------------|----------------------------------|
| Use specific boots     | <input type="radio"/>            | <input type="radio"/>            | <input checked="" type="radio"/> |
| Wear specific clothing | <input checked="" type="radio"/> | <input type="radio"/>            | <input type="radio"/>            |
| Wash hands/use gloves  | <input type="radio"/>            | <input checked="" type="radio"/> | <input type="radio"/>            |

**Is the area used for sick animals empty after each use?**

- ☐ Yes
- ☒ No

**The area used for sick animals is...before each new introduction of other sick animals**

|             | Always                           | Sometimes             | Never                 |
|-------------|----------------------------------|-----------------------|-----------------------|
| Cleaned     | <input checked="" type="radio"/> | <input type="radio"/> | <input type="radio"/> |
| Disinfected | <input checked="" type="radio"/> | <input type="radio"/> | <input type="radio"/> |
| Dried       | <input checked="" type="radio"/> | <input type="radio"/> | <input type="radio"/> |

**Do you care for sick livestock before or after healthy livestock?**

- ☐ Before
- ☐ After
- ☒ No specific order

**Can a group of sick cattle be separated from the rest of the herd in case of an epidemic?**

- ☐ Always
- ☐ Sometimes
- ☒ Never

**Is a record kept of animal health data?**

- ☒ Yes
- ☐ No

**Are there written protocols for vaccination, disease treatment, and hygiene procedures?**

- ☐ Yes
- ☒ No

**Is a bacteriological examination of the udder of all cows performed regularly (i.e., at least once a year)?**

- ☒ Yes
- ☐ No

**What happens to animals identified as carriers of disease?**

- ☐ Elimination (always)      ☒ Elimination (sometimes).
- ☐ Segregation (always)      ☐ Segregation (sometimes)
- ☐ Nothing (always)      ☐ Nothing (sometimes)
- ☐ Delayed elimination (always)      ☐ Delayed elimination (sometimes)

**Litter type used in the sick pen:** Straw

### **III: Reproduction management**

**Are calving boxes available on the farm?**

- ☒ Yes, there are individual calving boxes
- ☐ Yes, there are shared calving boxes
- ☐ No

**Has the calving box ever been used to house sick animals, or is it adjacent to areas used for that?**

- ☐ Always
- ☒ Sometimes
- ☐ Never

**Are the cows in the calving box completely separated from the other animals?**

- ☐ Yes
- ☒ No

**Are... in the calving box?**

|                                           | Always                              | Sometimes                | Never                               |
|-------------------------------------------|-------------------------------------|--------------------------|-------------------------------------|
| <b>Compartment-specific boots worn</b>    | <input type="checkbox"/>            | <input type="checkbox"/> | <input checked="" type="checkbox"/> |
| <b>Compartment-specific clothing worn</b> | <input checked="" type="checkbox"/> | <input type="checkbox"/> | <input type="checkbox"/>            |
| <b>Hands washed/(new) gloves used</b>     | <input checked="" type="checkbox"/> | <input type="checkbox"/> | <input type="checkbox"/>            |

**The calving box is ... before the introduction of new animals?**

|             | Always                   | Sometimes                           | Never                               |
|-------------|--------------------------|-------------------------------------|-------------------------------------|
| Cleaned     | <input type="checkbox"/> | <input checked="" type="checkbox"/> | <input type="checkbox"/>            |
| Disinfected | <input type="checkbox"/> | <input type="checkbox"/>            | <input checked="" type="checkbox"/> |
| Dried       | <input type="checkbox"/> | <input type="checkbox"/>            | <input checked="" type="checkbox"/> |

**When helping with deliveries/abortions, are the hands and obstetric materials used always cleaned and disinfected before and after each delivery/abortion?**

- ☒ They are cleaned and disinfected
- ☐ They are only cleaned
- ☐ No

**When does the separation of the calf from the mother take place?**

- ☐ Within one hour of the calf's birth
- ☒ No separation; the calf remains with the mother as a suckling calf
- ☐ Just after birth

**If an abortion occurs, is the cow tested (i.e., abortion protocol)?**

- ☐ Always
- ☒ Sometimes
- ☐ Never

**Where are fetal tissues and membranes disposed of after a birth/abortion?**

- ☐ Are they left in the barn/delivery area or where the abortion occurred
- ☐ They are eaten by the cow/dog/other
- ☒ They are put on the manure pile/slurry pit
- ☐ Other

**Type of bedding used and how often changed:** Straw, changed when necessary (evaluation of dirtiness)

#### **IV: Calf rearing**

**How many colostrum meals do they make?** 3: The first with the mother, one or two the day after

**How many milk meals do they take?** Two each day

**How many liters of colostrum are given to the calf in the first six hours after birth?** Ad libitum

**How is the colostrum administered?**

- ☒ Directly from the mother
- ☐ Bottle
- ☒ Bucket
- ☐ Probe

**Does the mother give colostrum, or is the colostrum bank used on the farm?**

There is no colostrum bank, and it is given by the mother.

**Is it checked whether the quality of the colostrum is sufficient?**

☒ Yes and method: refractometer

☐ No

**Is there a frozen or artificial supply of colostrum in case the mother does not provide enough milk, or the colostrum has insufficient quality?**

☒ No

☐ Yes, there is a frozen supply from other cows on my farm

☐ Yes, there is a frozen reserve from outside my farm

☐ Yes, there is an artificial reserve

**If colostrum is not fed to the calf immediately after milking, is the colostrum stored in a refrigerator?**

☐ Yes

☒ No

**Are the materials used for colostrum administration (e.g., test tubes, bottles, etc.) cleaned and disinfected after each use?**

☐ They are cleaned and disinfected

☒ They are only cleaned

☐ No

**Are calves fed waste milk (i.e., milk not suitable for the bulk tank milk)?**

☒ Always (only the male calves)

☐ Sometimes (specify cases)

☐ Never

**If they give waste milk, what type is it?**

☒ High cells

☒ Antibiotic

☐ Colostrum/transitional milk

**Is the waste milk pasteurized? If yes, according to what process?**

Yes, at 65 °C for 30 minutes (after that, it remains for 12 hours and heat when needed at 40°C).

**If pasteurizer is used, does it undergo washing processes?**

Yes, only with water – no disinfectant

**To whom is the waste milk fed, and for how long?**

To the male calves until they are sold

**List the division of calf groups from birth to weaning**

Males and females in single pens; females in boxes with the calf feeder machine.

### **V: Calf housing**

**Are calves housed in individual pens/boxes or separate areas?**

☒ Yes

☐ No

**Are individual pens/calf boxes/separate areas empty after each use?**

☒ Yes

☐ No

**Are the individual pens/calf stalls/separated areas ... before each new introduction of calves?**

|             | Always                              | Sometimes                           | Never                    |
|-------------|-------------------------------------|-------------------------------------|--------------------------|
| Cleaned     | <input checked="" type="checkbox"/> | <input type="checkbox"/>            | <input type="checkbox"/> |
| Disinfected | <input type="checkbox"/>            | <input checked="" type="checkbox"/> | <input type="checkbox"/> |
| Dried       | <input type="checkbox"/>            | <input type="checkbox"/>            | <input type="checkbox"/> |

**Is calf contact between different group pens/single stalls/separate areas possible?**

☒ Yes

☐ No

**How large (number of animals) are the groups of calves that are grouped from individual pens/separated areas to group pens? 20>40**

**Are the group pens empty after each use?**

☐ Yes

☒ No

**Is the group enclosure (including single pens) ... before each new introduction of calves?**

|             | Always                | Sometimes                        | Never                            |
|-------------|-----------------------|----------------------------------|----------------------------------|
| Cleaned     | <input type="radio"/> | <input checked="" type="radio"/> | <input type="radio"/>            |
| Disinfected | <input type="radio"/> | <input checked="" type="radio"/> | <input type="radio"/>            |
| Dried       | <input type="radio"/> | <input type="radio"/>            | <input checked="" type="radio"/> |

**Are the single pens disinfected?**

Single pens are disinfected only in the spring/summer/autumn period but not in winter.

**During the same feeding session, are milk-feeding buckets/teats reused between calves?**

☒ Yes

☐ No

**Are the feeding buckets cleaned after each feeding session?**

☐ Yes

☒ No

**Is there a feeding order for calves?**

Male calves are fed first, then females from the same buckets without washing them.

## **VI: Health management of the herd**

**Do you use selective dry cow therapy?** No, all the cows receive blanket dry cow therapy with cefalonium dihydrate.

**Mastitis predominantly pathogens:** Environmental pathogens

**What antibiotics do you use for mastitis?** Amoxicillin/clavulanic acid

**Which antibiotics do you use to treat diarrheic calves?** Gentamicin in the case of *E. coli*

**Microbiological fecal control of calves with diarrhea?**

☐ Yes (how many times/year \_\_\_\_\_)

☒ No

**Do you perform *Cryptosporidium* spp. prevention?** No

**Do you vaccinate dry cows for neonatal calf diarrhea?**

☒ Yes: Rota-Corona

☐ No



**Do you vaccinate calf for bronchopneumonia?**

☐ Yes

☒ No

**Do you vaccinate for BVD?**

☒ Yes

☐ No

**IBR herd status:**

☒ IBR free

☐ IBR vaccination

☐ Unknown

**Is the drinking water quality checked annually at the source or storage tank by bacteriological analysis?**

☒ Yes

☐ No, but I am using a water supply

☐ No

**Is the drinking water quality checked annually at the main distribution points (watering source for livestock) by bacteriological analysis?**

☒ Yes

☐ No

**How often do you change the water in the calf buckets?**

☐ Always

☒ Sometimes (daily or every two days)

☐ Never

**Are the cow water troughs cleaned?**

☐ Always

☒ Sometimes

☐ Never

## **VII: Milking management**

**Do you use a milking parlor or a milking robot?**

☐ Milking robot

☒ Milking parlor

**How many times/year is performed a static measurement of the milking equipment? 2**

**How many cows are milked on average? 380**

**How many milkings are performed per day? 2**

**How many milking positions are in the milking parlor? 24 + 24**

**Do you use rubber or silicon liner liners?**

☒ Rubber liners

☐ Silicon liners

**Are milking clusters disinfected between cows?**

☒ Yes, after each cow

☐ Yes, after cows with mastitis

☐ Yes, after cows with high somatic cell count (SCC)

☐ No

**How are milking clusters disinfected between animals?**

☐ With hot water (more than 75°C)

☐ With steam

☒ Other

**Are teats cleaned before milking? If yes, how?**

☐ Yes, pre-dipping

☐ Yes, dry cleaning with separate towels

☐ Yes, wet washing and drying afterward with separate towels

☒ Yes, wet washing, but not drying afterward (disposable disinfectant wipes)

☐ No

**Is the first milk examined during preliminary extraction?**

☒ Yes

☐ No

**Are the teats disinfected after being milked?**

- ☒ Yes, with dipping
- ☐ Yes, with a spray
- ☐ No

**Are cows kept at the station for a while after milking?**

- ☐ Yes, from 30 minutes to one hour
- ☐ Yes, for more than one hour
- ☒ No

**Are the cows milked in a specific order?**

- ☒ Yes, cows with mastitis and/or high SCC are milked last
- ☐ Yes, cows with mastitis and/or high SCC are milked first
- ☐ No

**Are the udders of lactating cows shaved?**

- ☐ Yes, two or more per year
- ☐ Yes, once a year
- ☒ No

**Are the tails of lactating cows shaved?**

- ☐ Yes, two or more times a year
- ☐ Yes, once a year
- ☒ No

**What type of bedding do you use for lactating cows?** Straw in the cattle cubicle
